# Supplementary material
Source: Springer Nature journal article supplement (https://www.springermedizin.de/resource/supplementary/12936_2011_1800_MOESM1_ESM.pdf/9541828)
Supplement: MOESM1 [file 9541828]

**October 2007**

Baseline Survey

Females 15-49  
183,007

No recent pregnancy  
144,322

Recently pregnant  
38,685

Not selected  
37,405

Interviewed  
1,280

Incomplete information  
6

Sample analysed  
1,274

**Program Launch  
July 2008**

**February 2010**

Endline Survey

Females 15-49  
192,613

No recent pregnancy  
151,897

Recently pregnant  
40,716

Not selected  
39,336

Interviewed  
1,380

Incomplete information  
2

Sample analysed  
1,378
